# Supplementary material
Source: PubMed Central journal article supplement (PMC3797523)
Supplement: NIHMS497766-supplement.pdf [file NIHMS497766-supplement.pdf]

## SUPPLEMENTAL MATERIAL

**Supplementary Table 1.** Relative risk (RR) of coronary heart disease (CHD) with 95% confidence intervals (CI) for breakfast skippers and late night eaters stratified by updated risk factors.

|                          | Person Time<br>(%) | Skipping Breakfast* |                        | Late Night Eating† |                        |
|--------------------------|--------------------|---------------------|------------------------|--------------------|------------------------|
|                          |                    | RR (95% CI)         | Interaction<br>p-value | RR (95%CI)         | Interaction<br>p-value |
| <b>By Age</b>            |                    |                     |                        |                    |                        |
| ≤ 60 Years old           | 35                 | 1.55 (1.09, 2.22)   | 0.01                   | 1.88 (0.81, 4.36)  | 0.79                   |
| > 60 Years old           | 65                 | 1.06 (0.84, 1.33)   |                        | 1.29 (0.83, 2.00)  |                        |
| <b>By Smoking Status</b> |                    |                     |                        |                    |                        |
| Non-smoker               | 95                 | 1.19 (0.97, 1.45)   | 0.41                   | 1.31 (0.86, 2.00)  | 0.58                   |
| Current smoker           | 5                  | 1.23 (0.60, 2.50)   |                        | 6.71 (1.22, 36.75) |                        |
| <b>By Alcohol</b>        |                    |                     |                        |                    |                        |
| < 5g/day                 | 52                 | 1.35 (1.05, 1.73)   | 0.46                   | 1.98 (1.22, 3.20)  | 0.23                   |
| ≥ 5g/day                 | 48                 | 1.03 (0.77, 1.39)   |                        | 0.88 (0.42, 1.87)  |                        |

By Tertiles of Diet Quality

|             |    |                   |      |                   |      |
|-------------|----|-------------------|------|-------------------|------|
| 1 (lowest)  | 33 | 1.45 (1.09, 1.93) |      | 0.79 (0.34, 1.80) |      |
| 2           | 34 | 0.88 (0.62, 1.25) | 0.62 | 1.31 (0.62, 2.77) | 0.12 |
| 3 (highest) | 33 | 1.19 (0.86, 1.63) |      | 1.76 (0.92, 3.38) |      |

By Physical Activity

|                      |    |                   |      |                   |      |
|----------------------|----|-------------------|------|-------------------|------|
| < 15 MET hours/week  | 31 | 1.20 (0.88, 1.63) |      | 1.66 (0.88, 3.14) |      |
| 15-30 MET hours/week | 24 | 1.31 (0.89, 1.94) | 0.82 | 1.32 (0.56, 3.09) | 0.65 |
| > 30 MET hours/week  | 45 | 1.18 (0.85, 1.63) |      | 1.16 (0.58, 2.34) |      |

By Sleep

|                    |    |                    |      |                    |      |
|--------------------|----|--------------------|------|--------------------|------|
| < 7 hours/24 hours | 16 | 1.36 (1.05, 1.74)  |      | 1.71 (1.03, 2.85)  |      |
| 7-8hours/24 hours  | 59 | 0.97 (0.58, 1.61)  | 0.50 | 1.35 (0.44, 4.14)  | 0.09 |
| > 8 hours/24 hours | 3  | 1.65 (0.25, 10.88) |      | 0.35 (0.01, 10.91) |      |

By Television Watching

|                  |    |                   |      |                   |      |
|------------------|----|-------------------|------|-------------------|------|
| ≤ 1.5 hours/week | 9  | 1.40 (0.60, 3.23) |      | 0.65 (0.06, 7.09) |      |
| 2-6 hours/week   | 37 | 1.18 (0.84, 1.66) | 0.23 | 1.57 (0.80, 3.05) | 0.42 |

|                         |       |                   |      |                   |      |
|-------------------------|-------|-------------------|------|-------------------|------|
| 7-20 hours/week         | 42    | 1.27 (0.95, 1.71) |      | 1.77 (0.93, 3.35) |      |
| ≥ 21 hours/week         | 12    | 1.72 (0.44, 6.64) |      | 2.00 (0.50, 7.95) |      |
| By BMI                  |       |                   |      |                   |      |
| < 18.5                  | <0.05 | ‡                 |      | ‡                 |      |
| 18.5 - < 25             | 41    | 0.98 (0.65, 1.47) | 0.99 | 1.81 (0.94, 3.51) | 0.66 |
| 25 - < 30               | 47    | 1.18 (0.91, 1.53) |      | 1.52 (0.79, 2.95) |      |
| ≥ 30                    | 12    | 1.39 (0.87, 2.22) |      | 1.86 (0.69, 5.06) |      |
| By Hypertension         |       |                   |      |                   |      |
| No                      | 62    | 1.40 (1.07, 1.82) | 0.13 | 1.85 (0.97, 3.52) | 0.28 |
| Yes                     | 38    | 1.06 (0.81, 1.40) |      | 1.12 (0.67, 1.87) |      |
| By Hypercholesterolemia |       |                   |      |                   |      |
| No                      | 53    | 1.24 (0.92, 1.68) | 0.53 | 1.80 (1.00, 3.23) | 0.49 |
| Yes                     | 47    | 1.24 (0.97, 1.59) |      | 1.29 (0.74, 2.24) |      |
| By Diabetes             |       |                   |      |                   |      |
| No                      | 93    | 1.21 (0.99, 1.49) | 0.99 | 1.40 (0.91, 2.18) | 0.87 |
| Yes                     | 7     | 1.46 (0.76, 2.81) |      | 1.63 (0.49, 5.48) |      |

---

\*Eating breakfast is the reference group for the skipping breakfast analysis.

†Not eating late at night is the reference group for the late night eating analysis.

‡Too small n to conduct analysis.

Multivariate model is adjusted for: age (months), diet quality (quintiles of alternate Healthy Eating Index 2010 score), energy intake (quintiles of kcal/day), alcohol intake (0, 0.1-<5, 5-<15, 15-<30, 30+ g/day, missing), eating frequency (1-8 times/day), smoking (never, past, current, missing), marital status (yes, no, missing), full-time work status (yes, no, missing), physical activity (quintiles MET hours/week), physical exam in last two years (yes/no), television (asked in categories 0-1.5, 2.0-6.0, 7.0-20.0, ≥21.0 hours/week, missing), sleep (<7, 7-8, >9 hours/24 hours, missing), diabetes (yes/no), hypercholesterolemia (yes/no), hypertension (yes/no), parental myocardial infarction <60 years of age (yes/no), and BMI (<18.5, 18.5-24.9, 25-29.9, 30+ kg/m<sup>2</sup>, missing) except for when stratified by one of these variables. Covariates were updated every 2 years unless they are dietary variables in which case they were updated every 4 years.
